# Supplementary material
Source: PubMed Central journal article supplement (PMC2857070)

**Table S1.** Summary of crystallographic statistics

|                                             |                     |
|---------------------------------------------|---------------------|
| <b>Data Sets</b>                            | <i>Native 1</i>     |
| Space group                                 | P2 <sub>1</sub>     |
| Unit cell parameters (Å)                    |                     |
| a                                           | 39.55               |
| b                                           | 37.98               |
| c                                           | 43.76               |
| β                                           | 102.68              |
| Temperature                                 | 100 K               |
| Resolution limits (Å)                       | 19.3 - 1.35         |
| Last shell limits (Å)                       | 1.37 - 1.35         |
| Completeness (%) <sup>1</sup>               | 94.8 (89.3)         |
| Reflections                                 | 51168               |
| Unique reflections                          | 24978               |
| I/s                                         | 11.7 (2.1)          |
| R <sub>sym</sub> (%) <sup>2</sup>           | 5.0 (45.5)          |
| <b>Final refinement statistics</b>          | <i>Native model</i> |
| Resolution limits (Å)                       | 19.3 - 1.35         |
| Refined number of reflections               | 24978               |
| Number of reflections for R <sub>free</sub> | 1567                |
| Overall R <sub>cryst</sub> (%) <sup>3</sup> | 18.5                |
| Overall R <sub>free</sub> (%) <sup>4</sup>  | 21.4                |
| <b>Number of protein residues</b>           | <b>139</b>          |
| Mean bond distance (RMS deviation)          | 1.427 (0.018)       |
| Mean angle distance (RMS deviation)         | 2.427 (0.030)       |
| Average B-factor (Å <sup>2</sup> )          | 15.34               |
| Total refined atoms                         | 1567                |
| Protein Atoms                               | 1132                |
| Solvent Atoms                               | 109                 |
| Fe <sup>+3</sup> Ions                       | 1                   |

<sup>1</sup> Number in parentheses indicate values for the highest resolution shell.

$$^2 R_{\text{sym}} = \frac{\sum[|I_i - \langle I_i \rangle|]}{\sum[\langle I_i \rangle]}$$

$$^3 R_{\text{cryst}} = \frac{\sum||F_{\text{obs}}| - |F_{\text{calc}}||}{\sum|F_{\text{obs}}|}$$

<sup>4</sup> R<sub>free</sub> is the same as R<sub>cryst</sub> for a random subset not included in the refinement of 6 % of total reflection.

Table S2. Redox mediators and their midpoint potentials

| <b>Mediator</b>                                                | <b><math>E_m</math> (vs. NHE) mV</b> | <b><math>E_m</math> (vs. Ag/AgCl) mV</b> |
|----------------------------------------------------------------|--------------------------------------|------------------------------------------|
| Fe(NOTA) <sup>0/-</sup>                                        | 195                                  | -1                                       |
| [Fe(tacn) <sub>2</sub> ] <sup>3+/2+</sup>                      | 146                                  | -50                                      |
| [Co((NMe <sub>3</sub> ) <sub>2</sub> sar)] <sup>5+/4+</sup>    | 10                                   | -186                                     |
| [Co(CLME-N <sub>4</sub> S <sub>5</sub> -sar)] <sup>3+/2+</sup> | -136                                 | -332                                     |
| [Co(AMME-N <sub>5</sub> S-sar)] <sup>3+/2+</sup>               | -220                                 | -416                                     |
| [Co(sep)] <sup>3+/2+</sup>                                     | -296                                 | -500                                     |
| [Co(AMMEsar)] <sup>3+/2+</sup>                                 | -380                                 | -576                                     |
| [Co(cis-diammac)] <sup>3+/2+</sup>                             | -503                                 | -699                                     |

Fig. S1. Absorption spectra of purified Cgb. *A.* The absorption spectra for CN-bound crystallized Cgb (blue), CN-bound Cgb in solution (black), and oxyferrous Cgb in solution (red). *B.* The absorption spectra for as-purified G5<sub>YF</sub> (blue) and H23<sub>EA</sub> (black) Cgb.

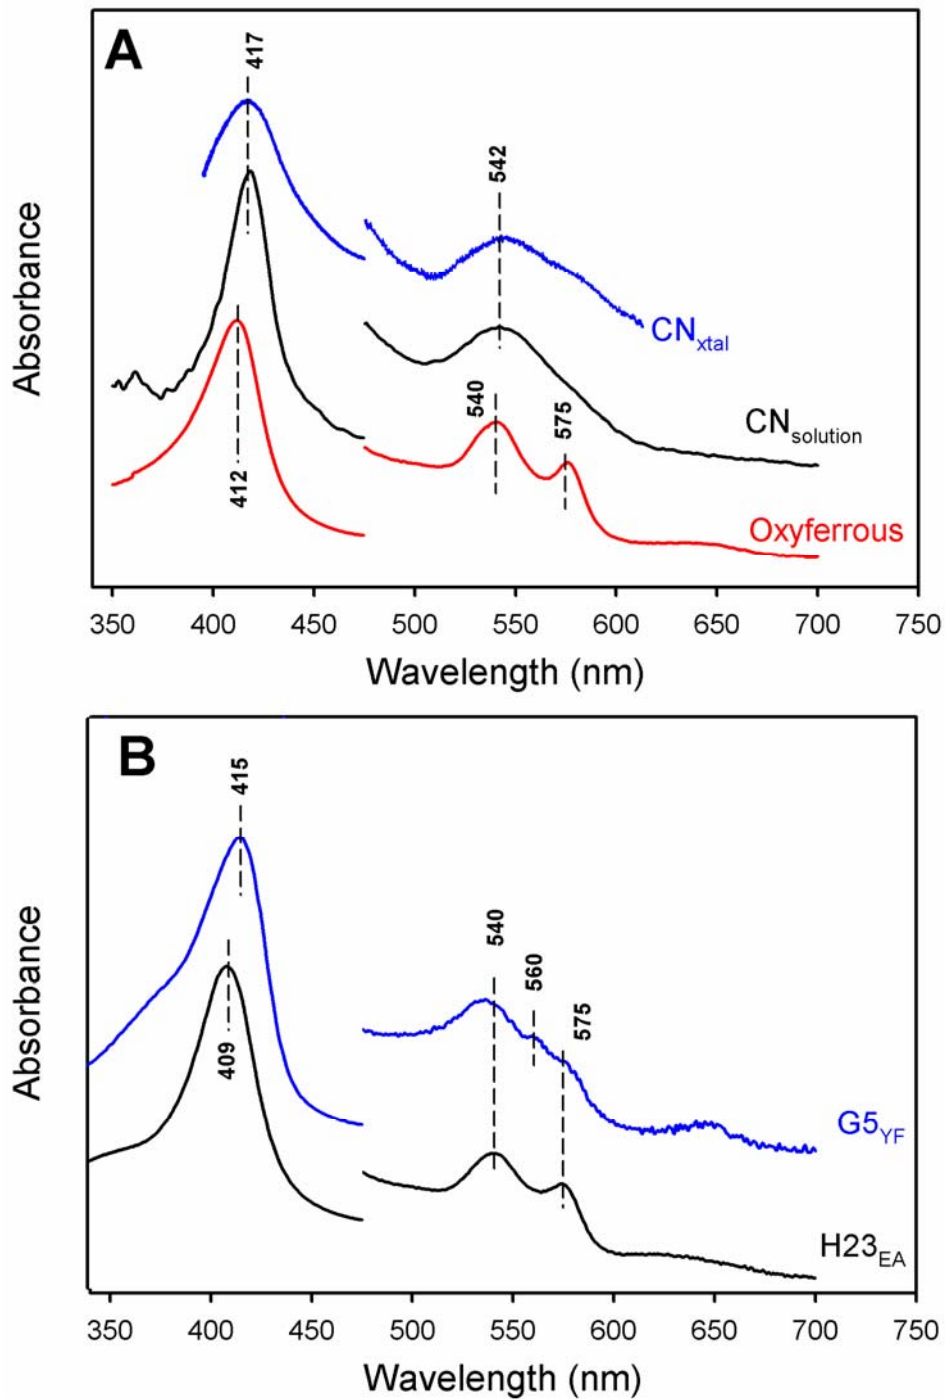

**Fig. S2.** Multiple sequence alignment of bacterial globins and myoglobin. Cgb shares 42%, 33%, and 10% sequence identity with Vgb, the globin domain of Hmp, and swMb, respectively. The B10, CD1, E7, G5, and H23 labels correspond to residues of the bacterial globins, but do not align with these residues in sperm whale myoglobin (swMb).

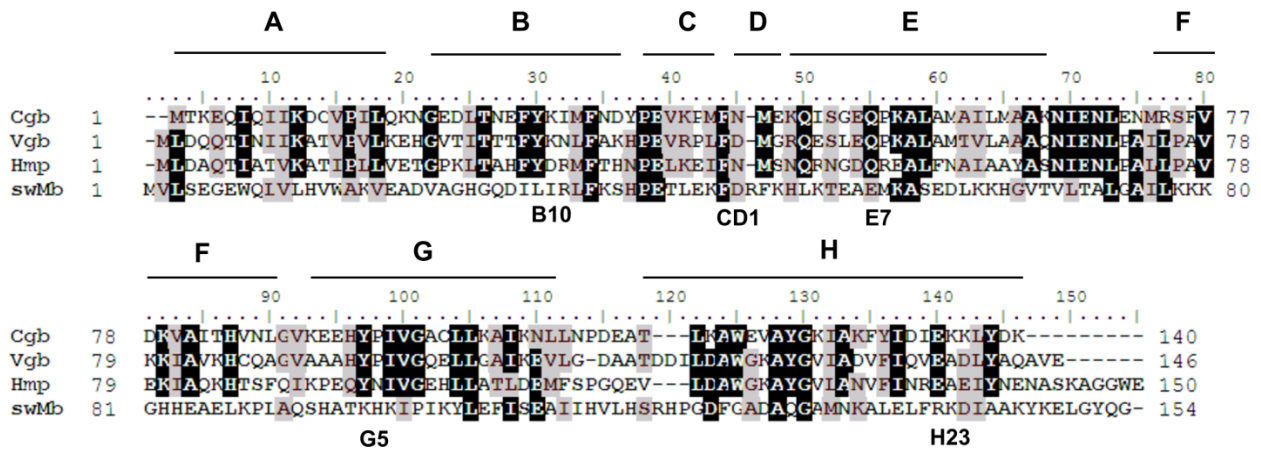

Fig. S3. 2Fo-Fc electron density map for residues 43-46 of the D-helix of Cgb. The map is contoured at 1.70  $\sigma$ .

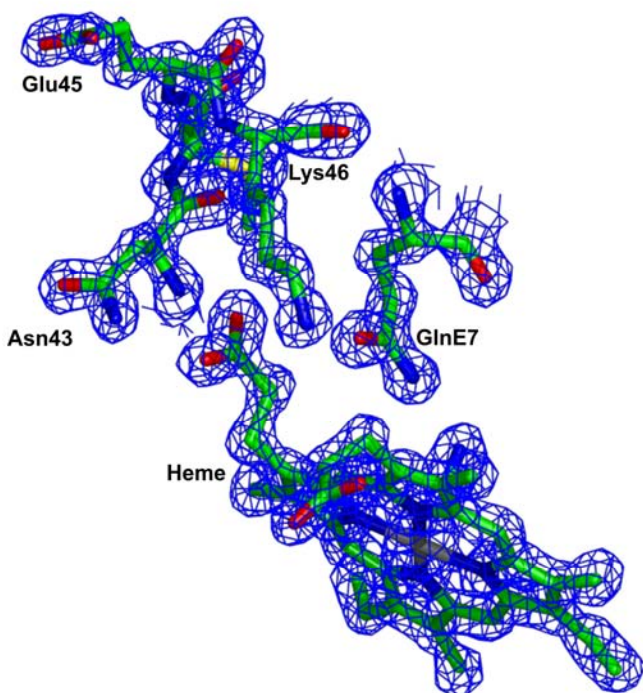

Supplement: supp_M109.084509_jbc.M109.084509-1.pdf [file supp_M109.084509_jbc.M109.084509-1.pdf]
